# Supplementary material for: DkXTH8, a novel xyloglucan endotransglucosylase/hydrolase in persimmon, alters cell wall structure and promotes leaf senescence and fruit postharvest softening
Source: PubMed Central journal article supplement (PMC5155436; doi:10.1038/srep39155), 2016-12-14
Supplement: srep39155-s1.pdf [file srep39155-s1.pdf]

1 **DkXTH8, a novel xyloglucan endotransglucosylase/hydrolase in persimmon, alters cell**  
2 **wall structure and promotes leaf senescence and fruit postharvest softening**

3

4 Ye Han<sup>1</sup>, Qiuyan Ban<sup>1</sup>, Hua Li, Yali Hou, Mijing Jin, Shoukun Han, Jingping Rao\*,

5 *College of Horticulture, Northwest A&F University, Yangling, 712100, Shaanxi, China*

6

7 <sup>1</sup> Ye Han and Qiuyan Ban contributed equally to this work.

8

9

10 \*Corresponding author:

11 Tel.: +86-29-81082613

12 fax: +86-29-87082613

13 E-mail address: raojingpingxn@163.com (Jingping Rao)

14

15 **Supplemental Figure S1. Molecular characterization of WT and**  
16 ***DkXTH8*-overexpressing plants.**

17 (a) Diagram of CaMV 35S promoter-*DkXTH8* constructs in the pVBG2307 binary vector.  
18 The vector encoding bacterial neomycin phosphotransferase II (npt II), which is regulated by  
19 CaMV 35S2 promoter (35S2-pro) and 3'-UTR, served as selectable marker for transformation.  
20 *DkXTH8* was regulated by CaMV 35S promoter (35S-pro) and 3'-terminator (nos-ter). LB  
21 and RB indicate left and right T-DNA borders, respectively. (b) Expression levels of *DkXTH8*  
22 in four-week-old *Arabidopsis* leaves of WT and three transgenic lines (AL1, AL2, AL3). (c)  
23 Expression levels of *DkXTH8* in tomato fruits collected at the mature green period of WT and  
24 three transgenic lines (TL1, TL2, TL3). Expression of *DkXTH8* in AL1 and TL1 was used as  
25 the control with a nominal value of 1, respectively. Vertical bars indicate standard errors of  
26 three replicates.  
27

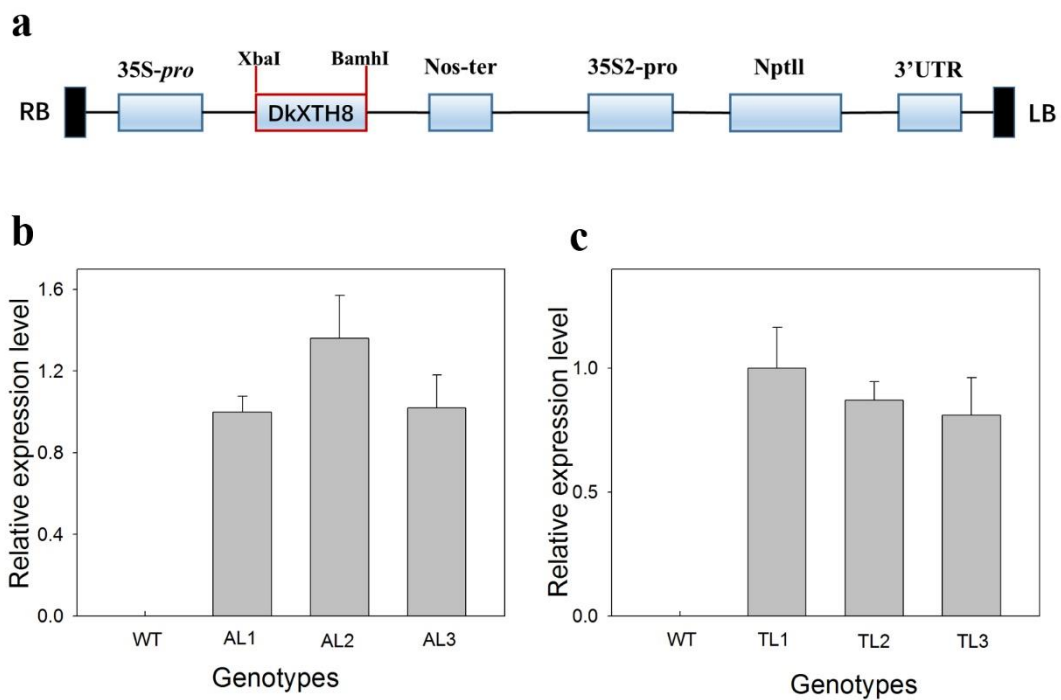

28
